# Supplementary material
Source: Springer Nature journal article supplement (https://www.springermedizin.de/resource/supplementary/13024_2014_578_MOESM7_ESM.pdf/9644420)

**a**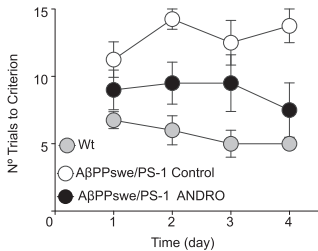**b**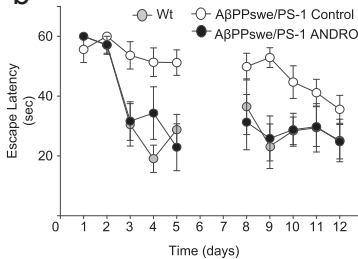**c**7 month-old AβPP/PS1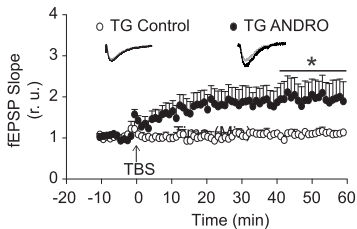**d**12 month-old AβPP/PS1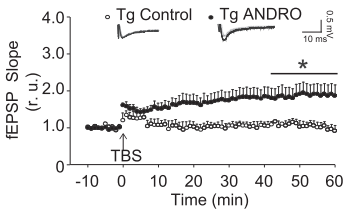

Supplement: MOESM7 [file 9644420]
